# Supplementary material for: Sword-like CuO/CeO2 composites derived from a Ce-BTC metal–organic framework with superior CO oxidation performance
Source: Royal Society of Chemistry journal article supplement (doi:10.1039/c8ra07531j), 2018-01-01
Supplement: c8ra07531j1.pdf [file c8ra07531j1.pdf]

## Supplementary content

### **Sword-like CuO/CeO<sub>2</sub> composites derived from Ce-BTC metal organic framework with superior CO oxidation performance**

Yin Wang <sup>a</sup>, Yiqiang Yang <sup>a</sup>, Ning Liu <sup>a</sup>, Yuxin Wang <sup>b</sup>, Xiaodong Zhang <sup>a,\*</sup>

<sup>a</sup> School of Environment and Architecture, University of Shanghai for Science and Technology,  
Shanghai 200093, China

<sup>b</sup> Institute of Applied Biotechnology, Taizhou Vocation & Technical College, Taizhou  
Zhejiang 318000, China

---

\* To whom correspondence should be addressed. Tel. +86 15921267160, Fax. +86 021 55275979  
E-mail address: [fatzxd@126.com](mailto:fatzxd@126.com), [zhangxiaodong@usst.edu.cn](mailto:zhangxiaodong@usst.edu.cn) (X.D. Zhang)

Table S1 Physicochemical properties of CuCe-BTC materials

| Catalysts             | BET<br>(m <sup>2</sup> g <sup>-1</sup> ) | Pore volume<br>(cm <sup>3</sup> g <sup>-1</sup> ) | Pore size<br>(nm) |
|-----------------------|------------------------------------------|---------------------------------------------------|-------------------|
| CuCeBTC-2             | 101                                      | 0.25                                              | 1.3~4             |
| CuCeBTC-5             | 120                                      | 0.28                                              | 1.3~4             |
| CuCeBTC-10            | 143                                      | 0.31                                              | 0.5~4             |
| CuCeBTC-20            | 194                                      | 0.23                                              | 0.5~4             |
| Ce-BTC <sup>[1]</sup> | 42                                       | 0.085                                             | 1.5~2             |

Table S2 Surface elemental composition and states of CuO/CeO<sub>2</sub> catalysts determined

by XPS results

| Catalysts                       | Surface composition |       |       |       | O <sub>latt</sub><br>(%) | O <sub>ads</sub><br>(%) | O <sub>OH</sub><br>(%) | Cu <sup>+/0</sup><br>(%) | Cu <sup>2+</sup><br>(%) |
|---------------------------------|---------------------|-------|-------|-------|--------------------------|-------------------------|------------------------|--------------------------|-------------------------|
|                                 | (at.%)              |       |       |       |                          |                         |                        |                          |                         |
|                                 | Cu2p                | Ce3d  | O1s   | C1s   |                          |                         |                        |                          |                         |
| CuCeO-2                         | 4.51                | 17.97 | 54.16 | 23.36 | 60.3                     | 18.2                    | 21.5                   | 48                       | 52                      |
| CuCeO-5                         | 5.07                | 16.59 | 53.61 | 24.73 | 72                       | 17.2                    | 10.8                   | 70                       | 30                      |
| CuCeO-10                        | 5.55                | 16.94 | 52.4  | 25.11 | 69                       | 10.8                    | 20.2                   | 63                       | 27                      |
| CuCeO-20                        | 8.61                | 15.19 | 51.13 | 25.07 | 64                       | 10.3                    | 25.7                   | 54                       | 46                      |
| CeO <sub>2</sub> <sup>[2]</sup> | —                   | 12.27 | 50.19 | 37.54 | 91.7                     | 8.3                     | —                      | —                        | —                       |

Table S3 H<sub>2</sub> consumption amount and reduction temperature of CuO/CeO<sub>2</sub> catalysts

| Catalysts | $\alpha$ peak                                           |                                            | $\beta$ peak                                            |                                            | $\gamma$ peak                                           |                                            |
|-----------|---------------------------------------------------------|--------------------------------------------|---------------------------------------------------------|--------------------------------------------|---------------------------------------------------------|--------------------------------------------|
|           | H <sub>2</sub> consumption<br>( $\mu\text{molg}^{-1}$ ) | Peak temperature<br>( $^{\circ}\text{C}$ ) | H <sub>2</sub> consumption<br>( $\mu\text{molg}^{-1}$ ) | Peak temperature<br>( $^{\circ}\text{C}$ ) | H <sub>2</sub> consumption<br>( $\mu\text{molg}^{-1}$ ) | Peak temperature<br>( $^{\circ}\text{C}$ ) |
| CuCeO-2   | 373                                                     | 150                                        | 907                                                     | 165                                        | 619                                                     | 193                                        |
| CuCeO-5   | 1030                                                    | 146                                        | 1994                                                    | 175                                        | 186                                                     | 204                                        |
| CuCeO-10  | 1122                                                    | 150                                        | 4030                                                    | 176                                        | 211                                                     | 214                                        |
| CuCeO-20  | 2364                                                    | 182                                        | 5791                                                    | 212                                        | 346                                                     | 251                                        |

Table S4 Catalytic activities for CO oxidation of CuO/CeO<sub>2</sub> catalysts derived from

MOFs

| Catalysts                          | Synthesis method                      | Morphology                         | Cu content (%) | Space velocity (mL h <sup>-1</sup> g <sup>-1</sup> ) | T <sub>100</sub> (°C) | References |
|------------------------------------|---------------------------------------|------------------------------------|----------------|------------------------------------------------------|-----------------------|------------|
| CuO/CeO <sub>2</sub>               | In-situ solvothermal method           | Sword                              | 4.18           | 18000                                                | 100                   | This work  |
| CuO-CeO <sub>2</sub>               | Incipient wetness impregnation method | Irregular particle                 | -              | 20000                                                | 150                   | 20         |
| CeO <sub>2</sub> :Cu <sup>2+</sup> | In-situ solvothermal method           | Nanorods made up of many particles | 10             | 60000                                                | 200                   | 21         |
| CuO@CeO <sub>2</sub>               | Incipient wetness impregnation method | Irregular spherical particle       | 30             | 48000                                                | 95                    | 33         |

Supplementary caption

**Fig. S1** XRD patterns of CeBTC (a), CuBTC (b), CuCeBTC-2 (c), CuCeBTC-5 (d), CuCeBTC-10 (e) and CuCeBTC-20 (f).

**Fig. S2** TG curves of CeBTC (a), CeCuBTC-5 (b), CeCuBTC-10 (c) and CeCuBTC-20 (d).

**Fig. S3** N<sub>2</sub> adsorption-desorption isotherms (A) and corresponding pore size distributions (B) of CeBTC (a), CuCeBTC-2 (b), CuCeBTC-5 (c), CuCeBTC-10 (d) and CuCeBTC-20 (e).

**Fig. S4** SEM images of CeBTC (a), CeCuBTC-2 (b), CeCuBTC-5 (c), CeCuBTC-10 (d) and CeCuBTC-20 (e).

**Fig. S5** N<sub>2</sub> adsorption-desorption isotherms (A) and corresponding pore size distributions (B) of CeO<sub>2</sub> (a), CuCeO-2 (b), CuCeO-5 (c), CuCeO-10 (d) and CuCeO-20 (e).

**Fig. S6** XRD results of CuCeO-5 before (a) and after (b) CO oxidation reaction

**Fig. S7** TEM result of CuCeO-5 after CO oxidation reaction

**Fig. S8** Catalytic activities for CO oxidation of CuCeO-2 (A), CuCeO-5 (B), CuCeO-10 (C) and CuCeO-20 (D) reused for three times

**Fig. S9** catalytic activities for CO oxidation at different space velocities (30000 mL h<sup>-1</sup> g<sup>-1</sup> (A), 60000 mL h<sup>-1</sup> g<sup>-1</sup> (B)) of CuCeO-2 (a), CuCeO-5 (b), CuCeO-10 (c) and CuCeO-20 (d).

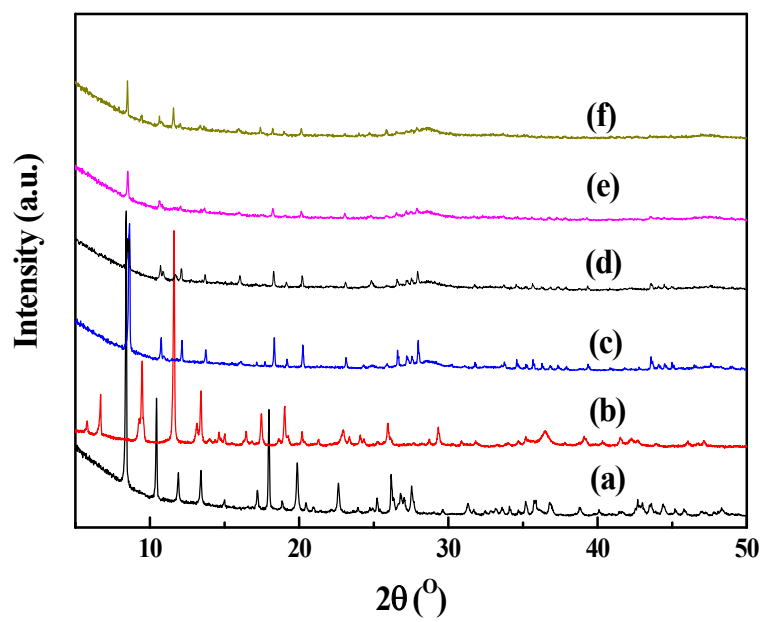

**Fig. S1** XRD patterns of CeBTC (a), CuBTC (b), CuCeBTC-2 (c), CuCeBTC-5 (d), CuCeBTC-10 (e) and CuCeBTC-20 (f).

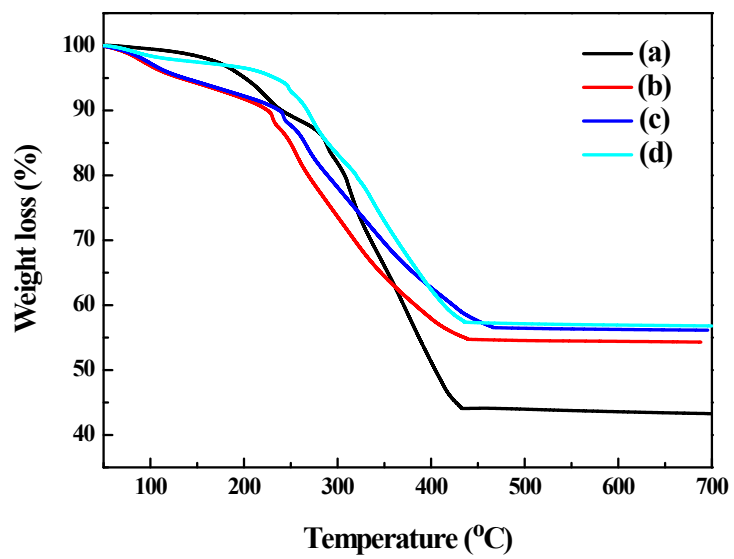

Fig. S2 TG curves of CeBTC (a), CeCuBTC-5 (b), CeCuBTC-10 (c) and CeCuBTC-20 (d).



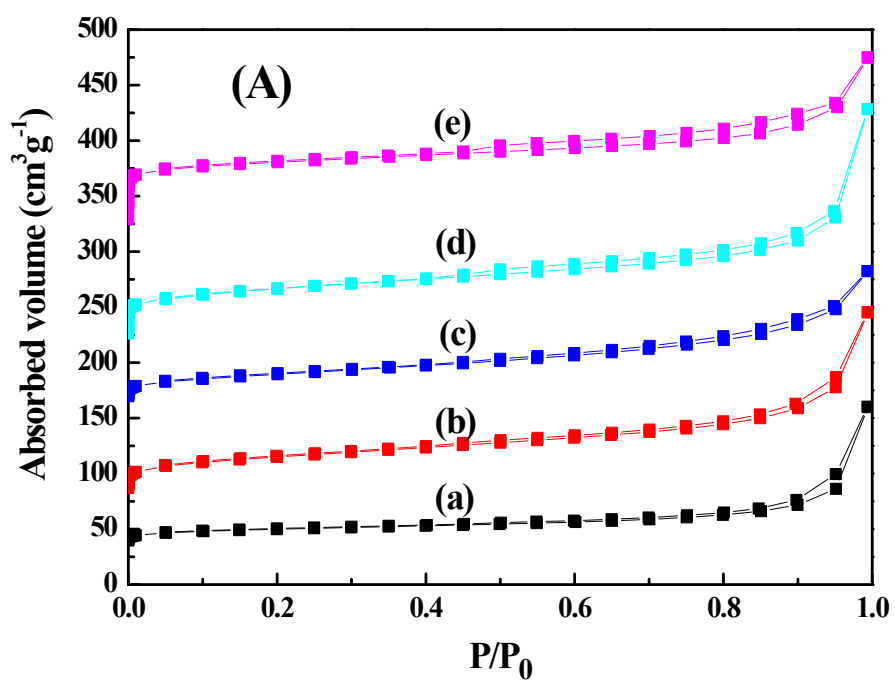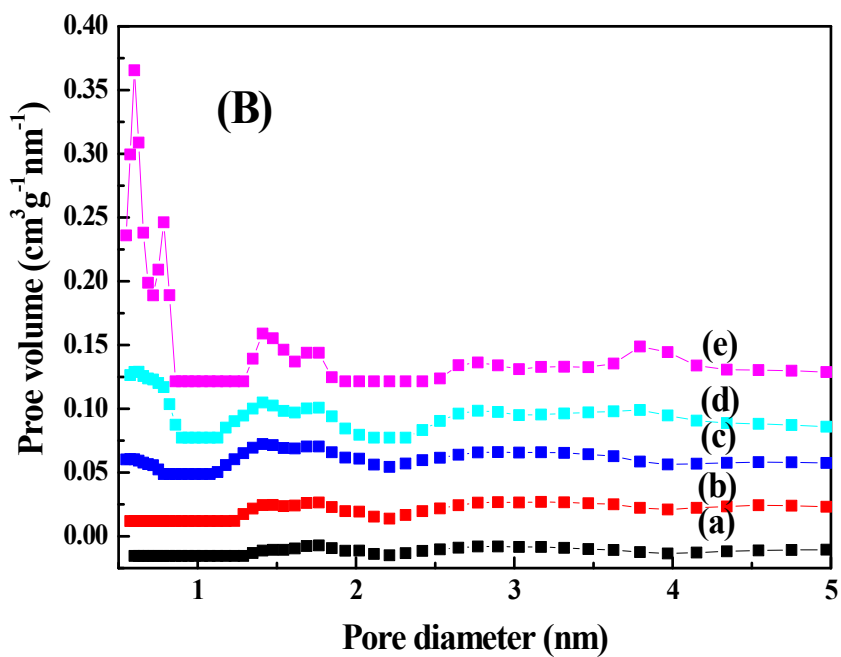

**Fig. S3**  $\text{N}_2$  adsorption-desorption isotherms (A) and corresponding pore size distributions (B) of CeBTC (a), CuCeBTC-2 (b), CuCeBTC-5 (c), CuCeBTC-10 (d) and CuCeBTC-20 (e).

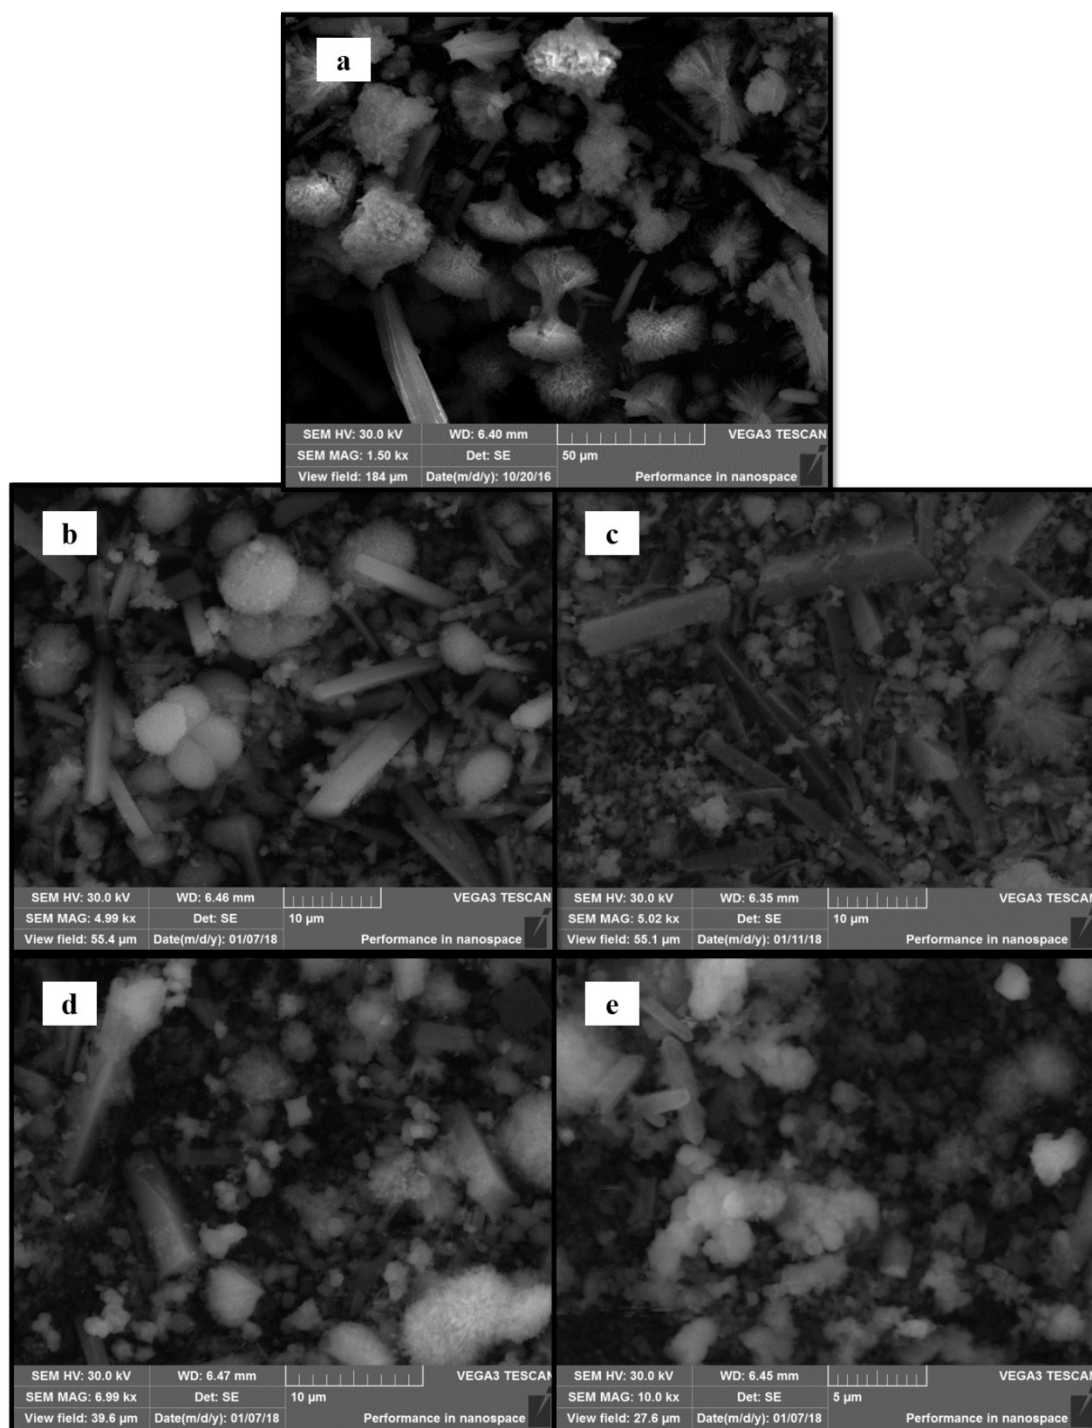

Fig. S4 SEM images of CeBTC (a), CeCuBTC-2 (b), CeCuBTC-5 (c), CeCuBTC-10 (d) and CeCuBTC-20 (e).

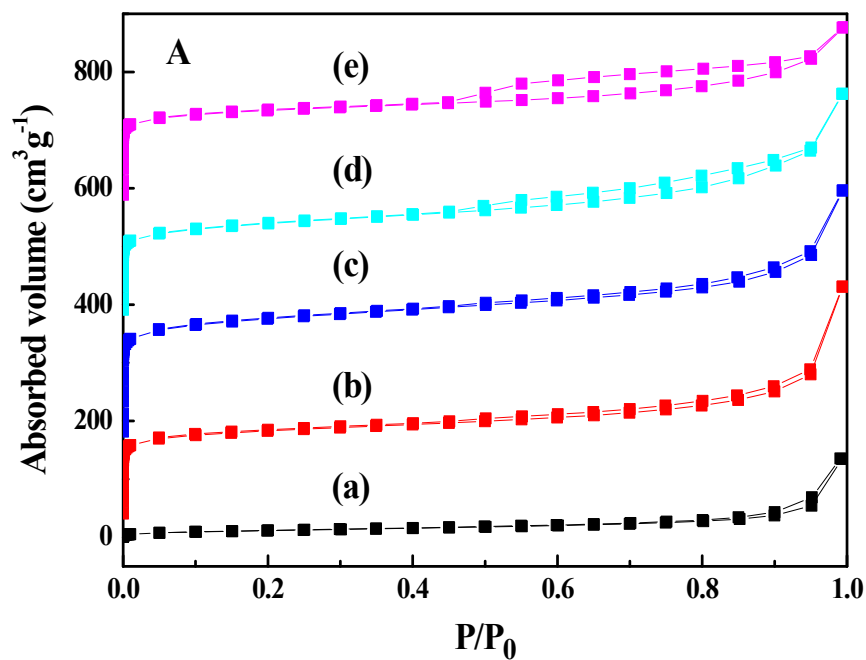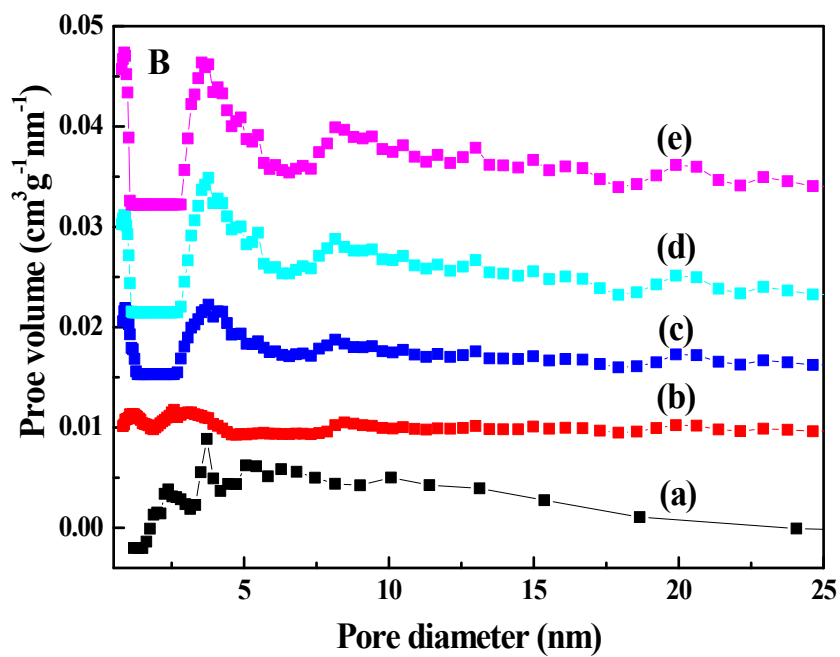

**Fig. S5**  $\text{N}_2$  adsorption-desorption isotherms (A) and corresponding pore size distributions (B) of  $\text{CeO}_2$  (a),  $\text{CuCeO-2}$  (b),  $\text{CuCeO-5}$  (c),  $\text{CuCeO-10}$  (d) and  $\text{CuCeO-20}$  (e).

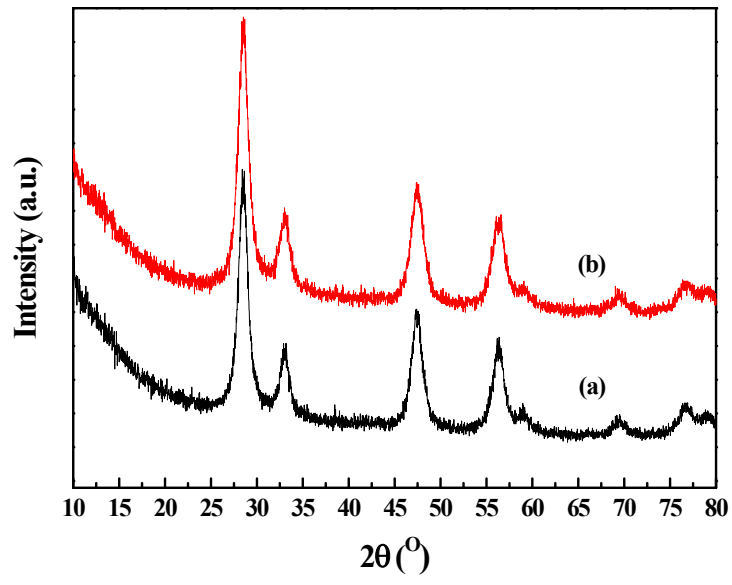

**Fig. S6** XRD results of CuCeO-5 before (a) and after (b) CO oxidation reaction

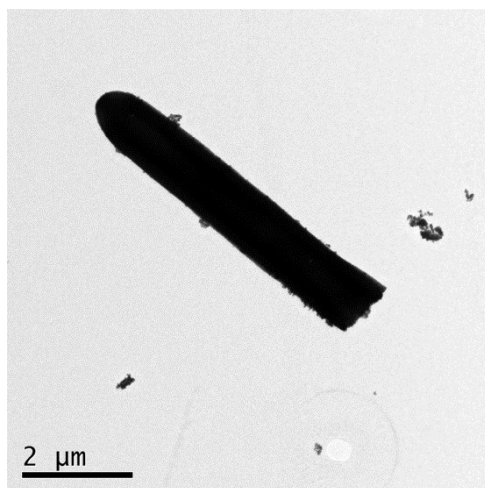

**Fig. S7** TEM result of CuCeO-5 after CO oxidation reaction

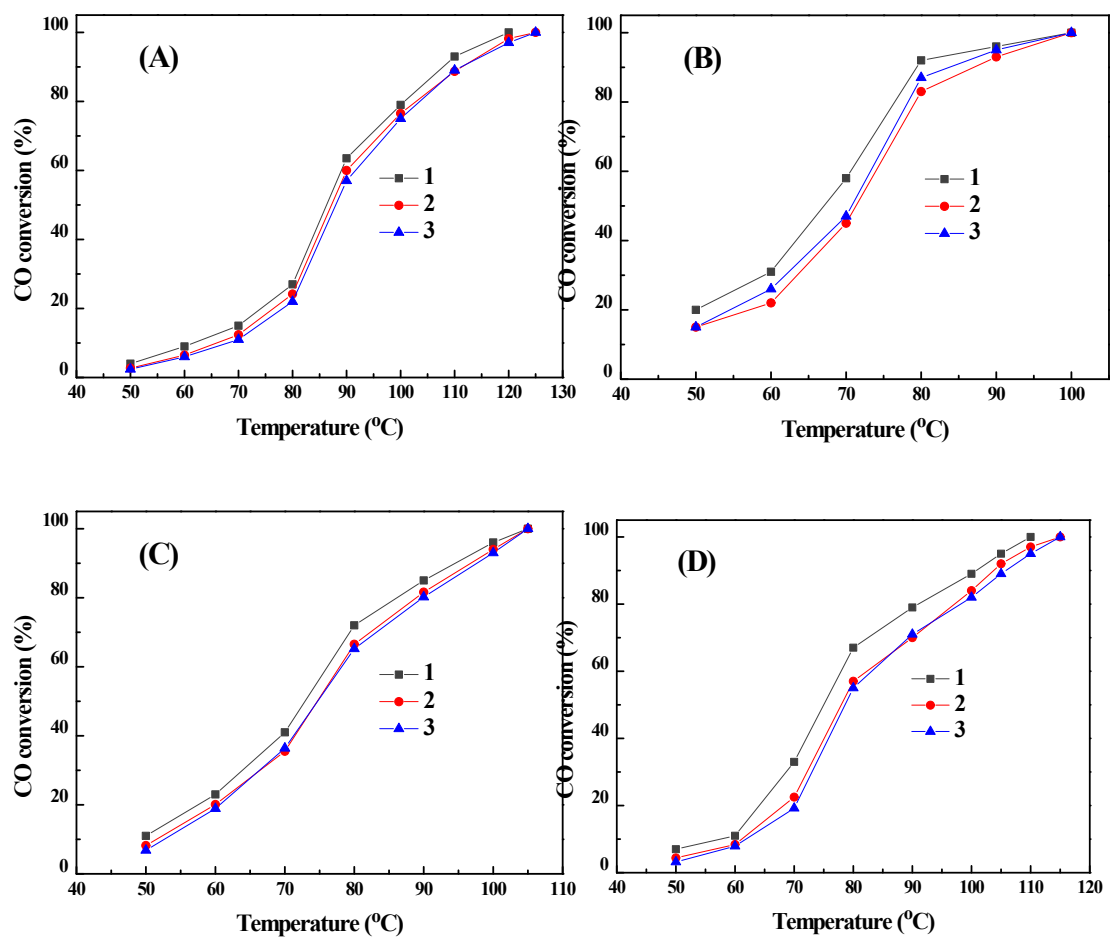

**Fig. S8** Catalytic activities for CO oxidation of CuCeO-2 (A), CuCeO-5 (B), CuCeO-10 (C) and CuCeO-20 (D) reused for three times

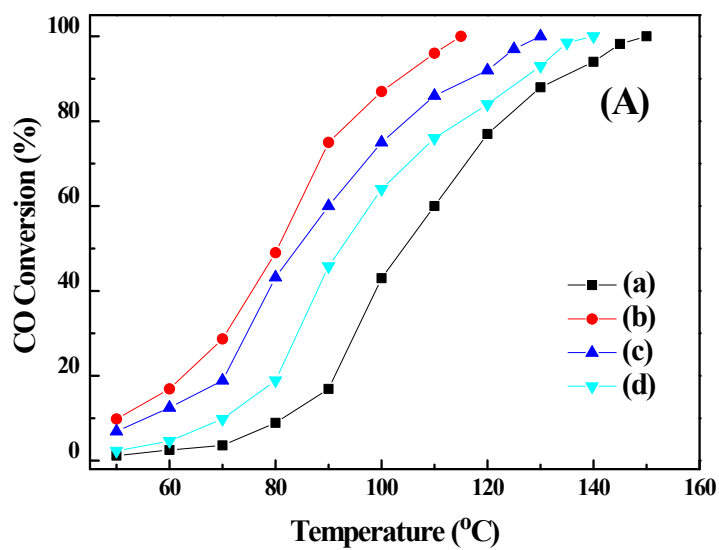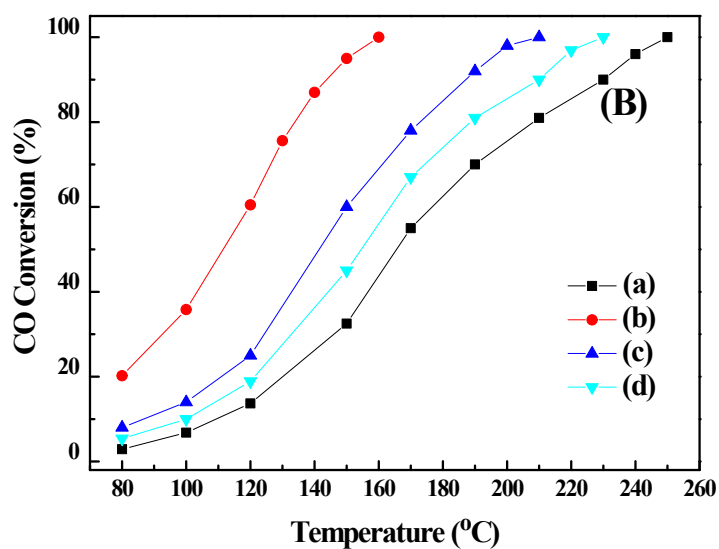

**Fig. S9** catalytic activities for CO oxidation at different space velocities ( $30000 \text{ mL h}^{-1} \text{ g}^{-1}$  (A),  $60000 \text{ mL h}^{-1} \text{ g}^{-1}$  (B)) of CuCeO-2 (a), CuCeO-5 (b), CuCeO-10 (c) and CuCeO-20 (d).
